# Supplementary material
Source: HighWire-hosted journal article supplement (https://erj.ersjournals.com/content/54/4/1901494)
Supplement: inline-supplementary-material-1 [file inline-supplementary-material-1.pdf]

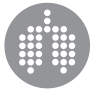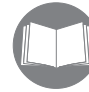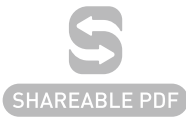

# Is adding fluoroquinolones to regimens for treating isoniazid-resistant tuberculosis necessary?

Roland Diel<sup>1,2</sup> and Neil W. Schluger<sup>3</sup>

**Affiliations:** <sup>1</sup>Institute for Epidemiology, University Medical Hospital Schleswig-Holstein, Kiel, Germany. <sup>2</sup>Lungenclinic Grosshansdorf, Airway Research Center North (ARCN), Member of the German Center for Lung Research (DZL), Großhansdorf, Germany. <sup>3</sup>Division of Pulmonary, Allergy and Critical Care Medicine, Columbia University Medical Center, New York, NY, USA.

**Correspondence:** Roland Diel, Institute for Epidemiology, University Medical Hospital Schleswig-Holstein, Niemannsweg 11, 24105 Kiel, Germany. E-mail: roland.diel@epi.uni-kiel.de

 @ERSpublications

**In patients with isoniazid-resistant tuberculosis, administering fluoroquinolones may not be required if the duration of (H)RZE treatment is long enough (12 months), even with relatively short durations of Z in the initiation phase** <http://bit.ly/2NjsCEQ>

**Cite this article as:** Diel R, Schluger NW. Is adding fluoroquinolones to regimens for treating isoniazid-resistant tuberculosis necessary? *Eur Respir J* 2019; 54: 1901494 [<https://doi.org/10.1183/13993003.01494-2019>].

This single-page version can be shared freely online.

Resistance against first-line drugs for treating tuberculosis (TB) continues to be a major public health challenge that hampers the World Health Organization (WHO)'s End TB strategy [1]. The End TB strategy aims to reduce TB deaths by 95% and new TB cases by 90% between 2015 and 2035. In 2017, the WHO recorded 558 000 cases (range 483 000–639 000) of TB not treatable with rifampicin, the most effective first-line anti-TB drug. Of these, 82% cases were of multidrug-resistant TB (MDR-TB) [2].
